# Supplementary material
Source: Springer Nature journal article supplement (https://www.springermedizin.de/resource/supplementary/12936_2008_853_MOESM7_ESM.pdf/9548384)

DIC

DB75 (465nm  
emission)

DB75 (558nm  
emission)

DB75 465nm  
and 558nm  
Overlay

Draq5

Overlay

Overlay w/ DIC

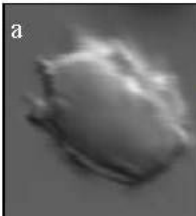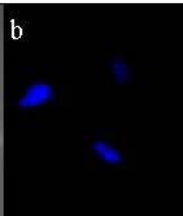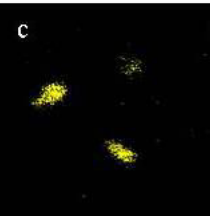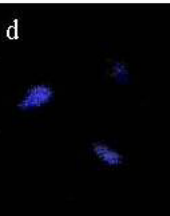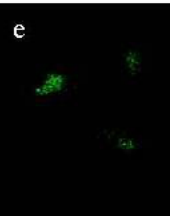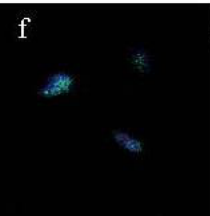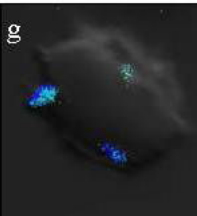

Supplement: MOESM7 [file 9548384]
